# Supplementary material for: When ontogeny recapitulates phylogeny: Fixed neurodevelopmental sequence of manipulative skills among primates
Source: PubMed Central journal article supplement (PMC7380958; doi:10.1126/sciadv.abb4685), 2020-07-24
Supplement: abb4685_SM.pdf [file abb4685_SM.pdf]

## Supplementary Materials for

### **When ontogeny recapitulates phylogeny: Fixed neurodevelopmental sequence of manipulative skills among primates**

Sandra A. Heldstab\*, Karin Isler, Caroline Schuppli, Carel P. van Schaik

\*Corresponding author. Email: [sandra.heldstab@uzh.ch](mailto:sandra.heldstab@uzh.ch)

Published 24 July 2020, *Sci. Adv.* **6**, eabb4685 (2020)  
DOI: 10.1126/sciadv.abb4685

#### **The PDF file includes:**

Figs. S1 to S3

#### **Other Supplementary Material for this manuscript includes the following:**

(available at [advances.sciencemag.org/cgi/content/full/6/30/eabb4685/DC1](https://advances.sciencemag.org/cgi/content/full/6/30/eabb4685/DC1))

Table S1

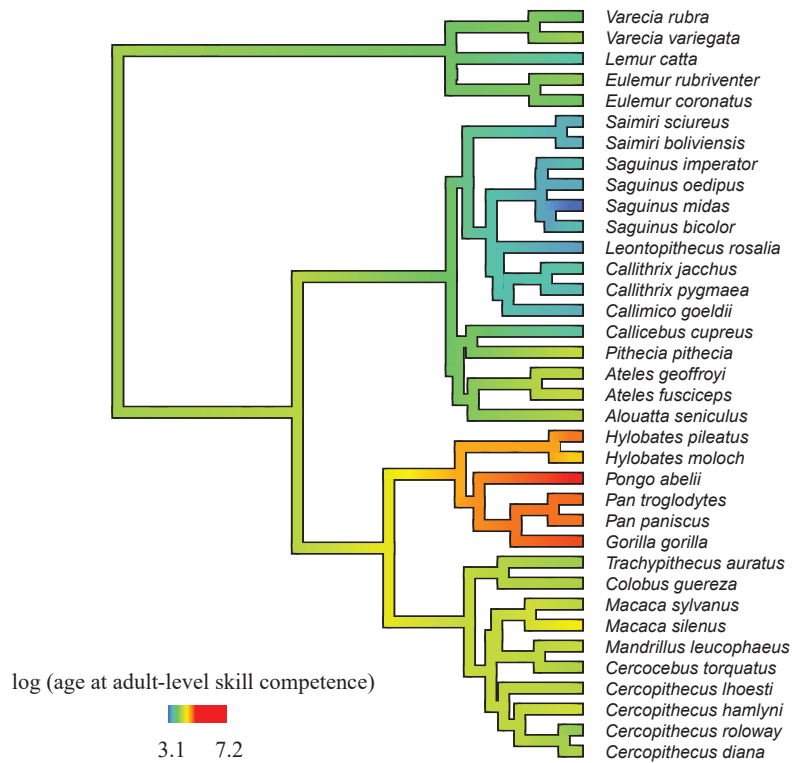

**Fig. S1.** The phylogenetic tree from (42) of 36 primate species used in the present study with an indication how logarithmized age at adult-level skill competence in days is distributed across the tree, ranging from very short (dark blue) to very long (red).

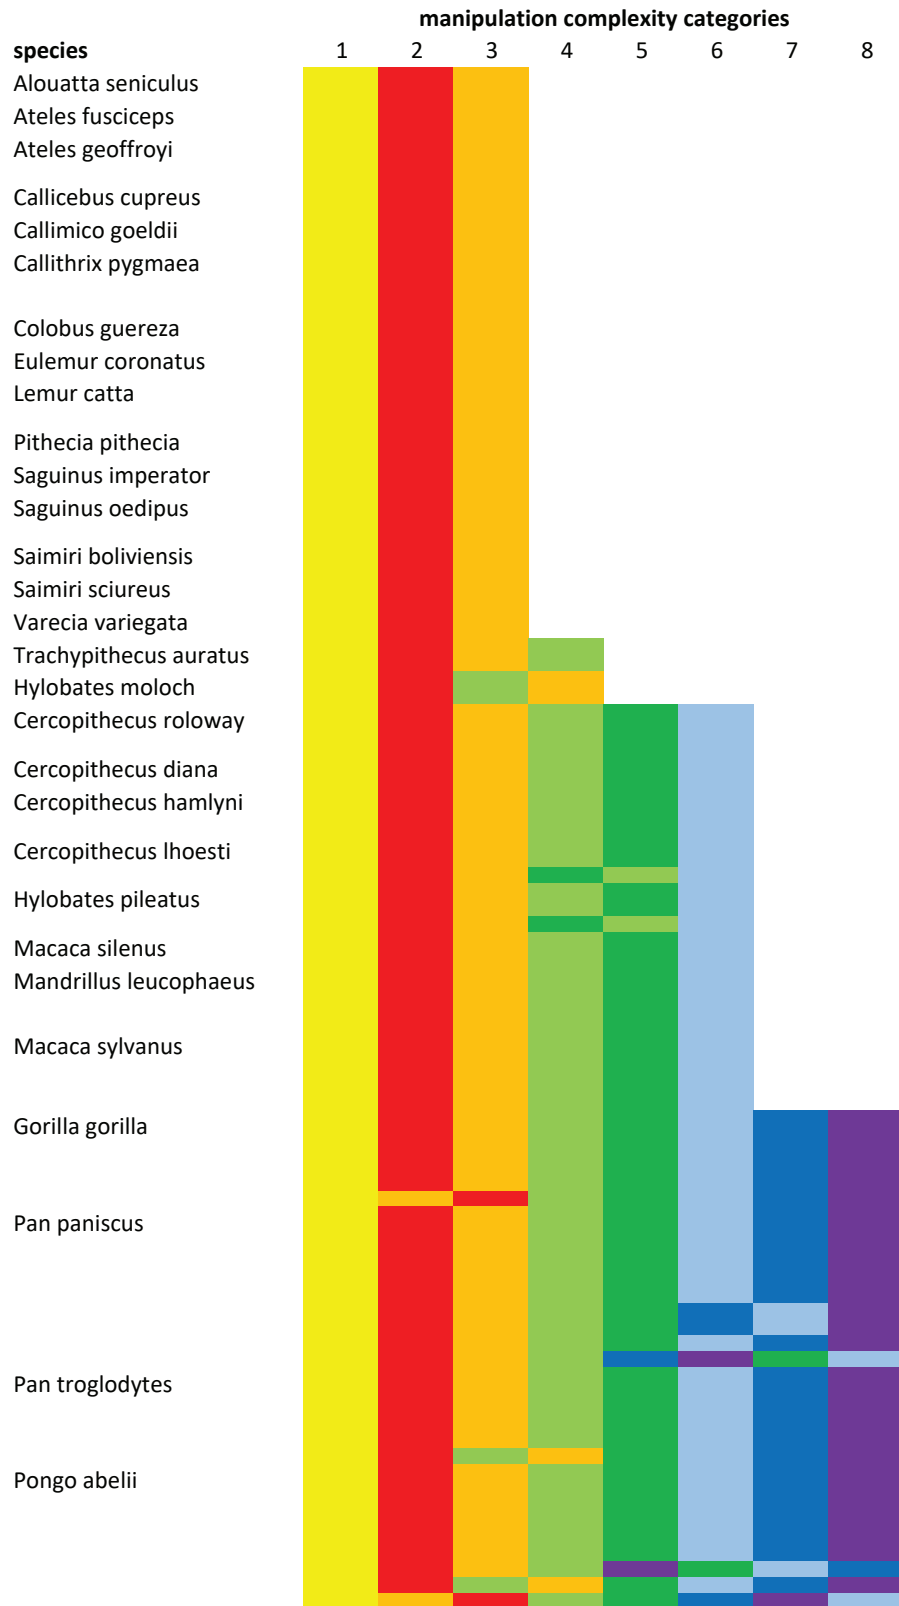

**Fig. S2.** Comparison between the interspecific manipulation complexity scale assigned in the previous study (14) and the ontogenetic scale of the present study with color coding. Each line represents one individual (between 1 and 9 individuals per species). The order of emergence of food manipulation categories during ontogeny follows almost exactly the order of the complexity scale found in the previous cross-species study. The few small differences between the ontogenetic and the interspecific complexity scale were all because adjacent steps were switched, e.g. categories 2 and 3 as well as categories 5 and 6.

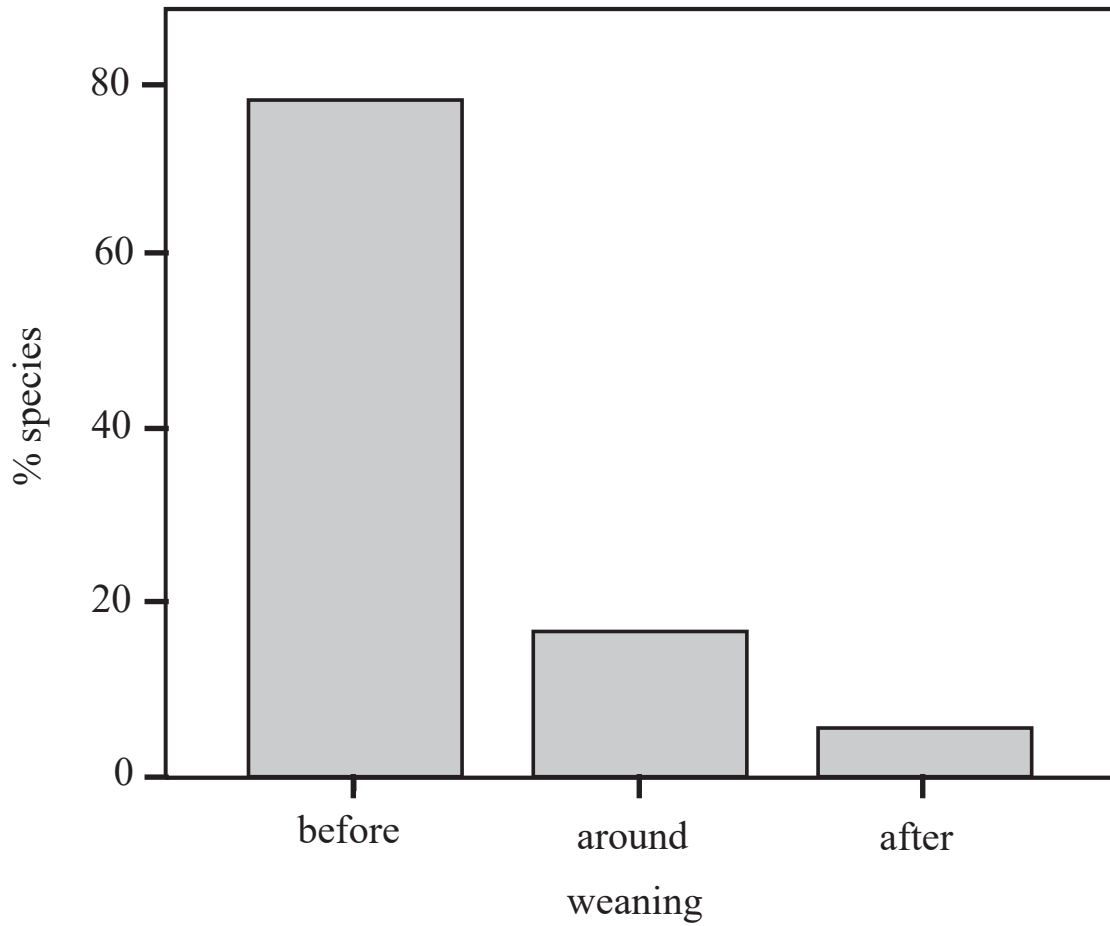

**Fig. S3.** Distribution of the different classes of food manipulation skill development in primates. Most out of a total of 128 individuals in 36 species reach adult-level food manipulation competence before or around weaning: 28 species, at weaning: 6 species, after weaning: 2 species). Species values are listed in Supplementary Materials Table S1.
